# Supplementary material for: Bacillus subtilis YngB contributes to wall teichoic acid glucosylation and glycolipid formation during anaerobic growth
Source: PubMed Central journal article supplement (PMC7961091; doi:10.1016/j.jbc.2021.100384), 2021-02-05
Supplement: mmc1.pdf [file mmc1.pdf]

## Supporting Information for

### ***Bacillus subtilis* YngB contributes to wall teichoic acid glucosylation and glycolipid formation during anaerobic growth**

**Chih-Hung Wu<sup>a</sup>, Jeanine Rismondo<sup>a,b</sup>, Rhodri M. L. Morgan<sup>c</sup>, Yang Shen<sup>d</sup>, Martin J. Loessner<sup>d</sup>, Gerald Larrouy-Maumus<sup>e</sup>, Paul S. Freemont<sup>f,g,h,#</sup>, Angelika Gründling<sup>a,#</sup>**

<sup>a</sup> Section of Molecular Microbiology and Medical Research Council Centre for Molecular Bacteriology and Infection, Imperial College London, London SW7 2AZ, United Kingdom

<sup>b</sup> current address: Department of General Microbiology, GZMB, Georg-August-Universität Göttingen, 37077 Göttingen, Germany

<sup>c</sup> Department of Life Sciences, Imperial College London, London SW7 2AZ, United Kingdom

<sup>d</sup> Institute of Food, Nutrition and Health, ETH Zürich, Schmelzbergstrasse 7, Zürich, CH-8092, Switzerland

<sup>e</sup> Department of Life Sciences, Medical Research Council Centre for Molecular Bacteriology and Infection, Imperial College London, London SW7 2AZ, United Kingdom

<sup>f</sup> London Biofoundry, Imperial College Translation and Innovation Hub, White City Campus, 80 Wood Lane, London, W12 0BZ, United Kingdom

<sup>g</sup> Section of Structural and Synthetic Biology, Department of Infectious Disease, Imperial College London, London, SW7 2AZ, United Kingdom

<sup>h</sup> UK Dementia Research Institute Centre for Care Research and Technology, Imperial College London, London, United Kingdom

<sup>#</sup>To whom correspondence should be addressed:

Paul S. Freemont – p.freemont@imperial.ac.uk,  
Angelika Gründling – a.grundling@imperial.ac.uk

List of Material included:

Supplemental Table 1

Supplemental Table 2

Supplemental Table 3

Supplemental Figure S1

Supplemental Figure S2

Supplemental Figure S3

## Supplemental Tables

**Table S1. Observed and predicted masses of parental and MS/MS fragments for the glycolipids (32:0) [DAG-Glc<sub>2</sub> + Na<sup>+</sup>] and (32:0) [DAG-Glc<sub>3</sub> + Na<sup>+</sup>].**

| Observed mass                                        | Predicted mass | Chemical formula                                                   |
|------------------------------------------------------|----------------|--------------------------------------------------------------------|
| <b>(32:0) [DAG-Glc<sub>2</sub> + Na<sup>+</sup>]</b> |                |                                                                    |
| 915.6                                                | 915.6          | (32:0) DAG-Glc-Glc + Na <sup>+</sup>                               |
| 673.5                                                | 673.3          | (17:0) MAG-Glc-Glc - H <sub>2</sub> O + Na <sup>+</sup>            |
| 645.5                                                | 645.3          | (15:0) MAG-Glc-Glc - H <sub>2</sub> O + Na <sup>+</sup>            |
| 405.2                                                | 405.1          | CH <sub>2</sub> =CH-CH <sub>2</sub> -Glc-Glc + Na <sup>+</sup>     |
| 365.1                                                | 365.1          | Glc-Glc + Na <sup>+</sup>                                          |
| 347.2                                                | 347.1          | Glc-Glc - H <sub>2</sub> O + Na <sup>+</sup>                       |
| 327.3                                                | 327.3          | (17:0) MAG - OH                                                    |
| 299.3                                                | 299.3          | (15:0) MAG - OH                                                    |
| <b>(32:0) [DAG-Glc<sub>3</sub> + Na<sup>+</sup>]</b> |                |                                                                    |
| 1077.8                                               | 1077.7         | (32:0) DAG-Glc-Glc-Glc + Na <sup>+</sup>                           |
| 835.4                                                | 835.4          | (17:0) MAG-Glc-Glc-Glc - H <sub>2</sub> O + Na <sup>+</sup>        |
| 807.4                                                | 807.4          | (15:0) MAG-Glc-Glc-Glc - H <sub>2</sub> O + Na <sup>+</sup>        |
| 567.2                                                | 567.2          | CH <sub>2</sub> =CH-CH <sub>2</sub> -Glc-Glc-Glc + Na <sup>+</sup> |
| 527.2                                                | 527.2          | Glc-Glc-Glc + Na <sup>+</sup>                                      |
| 509.1                                                | 509.2          | Glc-Glc-Glc - H <sub>2</sub> O + Na <sup>+</sup>                   |

MAG – monoacylglycerol; DAG – diacylglycerol; Glc – glucose. Note that only the observed masses for the glycolipids isolated from the wild-type strain are listed.

**Table S2. Bacterial strains used in this study**

| Unique ID                               | Strain name and resistance                                                                                                                                                                 | Source     |
|-----------------------------------------|--------------------------------------------------------------------------------------------------------------------------------------------------------------------------------------------|------------|
| <b><i>Escherichia coli</i> strains</b>  |                                                                                                                                                                                            |            |
| ANG127                                  | XL1-Blue                                                                                                                                                                                   | Stratagene |
| ANG191                                  | BL21(DE3)                                                                                                                                                                                  | (1)        |
| ANG5206                                 | XL1-Blue pET28b- <i>gtaB</i> -cHis; KanR                                                                                                                                                   | This study |
| ANG5207                                 | XL1-Blue pET28b- <i>yngB</i> -cHis; KanR                                                                                                                                                   | This study |
| ANG5208                                 | BL21(DE3) pET28b- <i>gtaB</i> -cHis; KanR                                                                                                                                                  | This study |
| ANG5209                                 | BL21(DE3) pET28b- <i>yngB</i> -cHis; KanR                                                                                                                                                  | This study |
| ANG680                                  | DH5α pDR111; AmpR                                                                                                                                                                          | (2)        |
| <b><i>Bacillus subtilis</i> strains</b> |                                                                                                                                                                                            |            |
| ANG1691                                 | 168, <i>trpC2</i>                                                                                                                                                                          | (3)        |
| ANG5277                                 | 168Δ <i>gtaB</i> :: <i>kan</i> ; KanR                                                                                                                                                      | (4)        |
| ANG5263                                 | 168Δ <i>yngB</i> :: <i>kan</i> ; KanR                                                                                                                                                      | (4)        |
| ANG5658                                 | 168Δ <i>gtaB</i> :: <i>erm</i> ; ErmR                                                                                                                                                      | (4)        |
| ANG5659                                 | 168Δ <i>yngB</i> :: <i>erm</i> ; ErmR                                                                                                                                                      | (4)        |
| ANG5675                                 | 168, <i>amyE</i> :: <i>spec</i> P <sub>hyper</sub> ; SpecR                                                                                                                                 | This study |
| ANG5676                                 | 168Δ <i>gtaB</i> :: <i>kan amyE</i> :: <i>spec</i> P <sub>hyper</sub> ; KanR SpecR<br>(Short: Δ <i>gtaB</i> P <sub>hyper</sub> )                                                           | This study |
| ANG5677                                 | 168Δ <i>gtaB</i> :: <i>kan amyE</i> :: <i>spec</i> P <sub>hyper-gtaB</sub> ; KanR SpecR<br>(Short: Δ <i>gtaB</i> P <sub>hyper-gtaB</sub> )                                                 | This study |
| ANG5678                                 | 168Δ <i>gtaB</i> :: <i>kan amyE</i> :: <i>spec</i> P <sub>hyper-yngB</sub> ; KanR SpecR<br>(Short: Δ <i>gtaB</i> P <sub>hyper-yngB</sub> )                                                 | This study |
| ANG5679                                 | 168Δ <i>yngB</i> :: <i>kan amyE</i> :: <i>spec</i> P <sub>hyper</sub> ; KanR SpecR<br>(Short: Δ <i>yngB</i> P <sub>hyper</sub> )                                                           | This study |
| ANG5680                                 | 168Δ <i>yngB</i> :: <i>kan amyE</i> :: <i>spec</i> P <sub>hyper-yngB</sub> ; KanR SpecR<br>(Short: Δ <i>yngB</i> P <sub>hyper-yngB</sub> )                                                 | This study |
| ANG5681                                 | 168Δ <i>gtaB</i> :: <i>erm</i> Δ <i>yngB</i> :: <i>kan amyE</i> :: <i>spec</i> P <sub>hyper</sub> ; ErmR KanR SpecR<br>(Short: Δ <i>gtaB</i> /Δ <i>yngB</i> P <sub>hyper</sub> )           | This study |
| ANG5682                                 | 168Δ <i>gtaB</i> :: <i>kan</i> Δ <i>yngB</i> :: <i>erm amyE</i> :: <i>spec</i> P <sub>hyper-gtaB</sub> ; ErmR KanR SpecR<br>(Short: Δ <i>gtaB</i> /Δ <i>yngB</i> P <sub>hyper-gtaB</sub> ) | This study |
| ANG5683                                 | 168Δ <i>gtaB</i> :: <i>erm</i> Δ <i>yngB</i> :: <i>kan amyE</i> :: <i>spec</i> P <sub>hyper-yngB</sub> ; ErmR KanR SpecR<br>(Short: Δ <i>gtaB</i> /Δ <i>yngB</i> P <sub>hyper-yngB</sub> ) | This study |

**Table S3. Primers used in this study**

| <b>Number</b> | <b>Name</b>                      | <b>Sequence</b>                                                    |
|---------------|----------------------------------|--------------------------------------------------------------------|
| ANG3161       | 5-NcoI-pET28b- <i>gtaB</i> -cHis | CATGCCATGGGCAAAAAAGTACGTAAAGCCATAAT<br>TCCAG                       |
| ANG3162       | 3-XhoI-pET28b- <i>gtaB</i> -cHis | CCGCTCGAGGCCGCTGCTGCCGCGCGGCACCAG<br>GATTTCTTCTTTGTTTAGTAAACCTTC C |
| ANG3163       | 5-NcoI-pET28b- <i>yngB</i> -cHis | CATGCCATGGGCAGAAAAAAGTGAGAAAAGCGGT<br>TATAC                        |
| ANG3164       | 3-XhoI-pET28b- <i>yngB</i> -cHis | CCGCTCGAGGCCGCTGCTGCCGCGCGGCACCAG<br>CCGCAGCATTCTTTTCGTTTCCCCTTG   |
| ANG111        | 5-pET28b-T7 promoter             | TAATACGACTCACTATAGGG                                               |
| ANG112        | 3-pET28b-T7 terminator           | GCTAGTTATTGCTCAGCGG                                                |
| ANG3197       | 5- <i>gtaB</i> :: <i>kan</i>     | TCATTTTAAATCATTTTATTCTTGATTC                                       |
| ANG3198       | 3- <i>gtaB</i> :: <i>kan</i>     | ATTTATGTTTTTCATTTAGTTTGTTTAAC                                      |
| ANG3199       | 5- <i>yngB</i> :: <i>kan</i>     | TATTGCCGCGTCAGGGATCACCTT TTTG                                      |
| ANG3200       | 3- <i>yngB</i> :: <i>kan</i>     | CTAATACAATCTCACTCGGAATGATTTTC                                      |
| ANG3203       | 5-HindIII-pDR111- <i>gtaB</i>    | CCCAAGCTTAAAATAAGGAGGACCTTTTAAATGAAA<br>AAAGTACGTAAAGC             |
| ANG3204       | 3-NheI-pDR111- <i>gtaB</i>       | CTAGCTAGCTTAGATTTCTTCTTTGTTTAGTAAACCT<br>TC                        |
| ANG3205       | 5-HindIII-pDR111- <i>yngB</i>    | CCCAAGCTTAAAATAAGGAGGAGAAGATGAATGAG<br>AAAAAAAGTGAGAAAAG           |
| ANG3206       | 3-NheI-pDR111- <i>yngB</i>       | CTAGCTAGCTTACCGCAGCATTTCTTTCGTTTCCCCT<br>TTG                       |
| ANG1663       | 5-pDR111- <i>amyE</i> -check     | GCGAGGGAAGCGTTCACAGTTTCGGGC                                        |
| ANG1664       | 3-pDR111- <i>amyE</i> -check     | CGGTTGTAGCCCAAACGCCTTTCCGTGG                                       |
| ANG1671       | 5-pDR111-seq                     | CGCTCTCCTGAGTAGGACAAATCCGC                                         |
| ANG1672       | 3-pDR111-seq                     | CGGGAAACGGTCTGATAAGAGACACC                                         |

## Supplemental Figures

```

GtaB (B. subtilis)      -----MKKVRKAIIPAAAGLGRFLPATKAMPKEMLPVVDKPTIQYIIEEAIVEAGIED 52
YngB (B. subtilis)      -----MRKKVRKAVIPAAAGLGRFLPATKAQPKEMLPVVDKPAIQYIIVEEAESGIED 53
YtdA (B. subtilis)      -----MIKKAIIPAGGFGTRNLPVTKVIPKEMFPVGSKPVIHYLVEELKESGIED 50
A4JT02 (B. vietnamiensis)  -----MLKVTKAVFPVAGLGRFLPATKASPKEMLPVVDKPLIQYAVEEAIEAGIE 52
GalU (C. glutamicum)      MSLPIDEHVNNAVKTVVVPAAGLGRFLPATKTVPKELLPVVDTPGIELIAEEAAELGATR 60
GalU (H. pylori)          -----MIKKLFPAAAGYGRFLPITKTIPKEMLPVVDKPLIQYAVEEAIEAGIEV 50
                          : . :.*.* ** * * *. **::*: . * * . * * *

GtaB (B. subtilis)      IIVTGKSKRAIEDHFDYSEPELERNLEEKGTELLEKVKKASN-LADIIHYIRQKEPKGLG 111
YngB (B. subtilis)      ILIITGRNKRISIEDHFDRSAELEFNLRKGGKTETLKEMQQIAD-LANIIHYIRQKEPLGLG 112
YtdA (B. subtilis)      ILMVVSSHKNLIVDYFDSLLALEAFLASKNKLHLR--EHPFP-DIRIHYVRQPYAKGLG 107
A4JT02 (B. vietnamiensis) MIFVTVGRSKRAIEDHFDKSYEIEAELEARGKEKLLSLVRSIXPSHVDCFYVVRQAEALGLG 112
GalU (C. glutamicum)      LAIITAPNKAGVLAHFERSSELEETLMERGKTDQVEIIRRAAD-LIKAVPVTQDKPLGLG 119
GalU (H. pylori)          MAIVTVGRNKRSLIEDYFDTSYIEHQIQGTNKENALKSIRNIE-KCCFSYVRQKMKGLG 109
                          : ::.. * : :*: * * : : . * . : . : * * *

GtaB (B. subtilis)      HAVWCARNFIGDEP--FAVLLGDDIVQAETPG--LRQLMDEYEKTLSSIIIGVQQVPEET 167
YngB (B. subtilis)      HAVLCAEHFIGDEP--FAVLGGDDIMVSETPA--LRQLMDVYDVYGVTEVVGVQSVLPEDV 168
YtdA (B. subtilis)      DAISFGKQFAGGEP--FAVVLDDLIIFSANQP-ALGQLIEAYTKYQSSVIGLKETKTEDL 164
A4JT02 (B. vietnamiensis) HAVLCAEKLVDGNDP--FAVILADLLDGGPTPV--LRQMIDVFDHYHASVIGVEEIIAPADS 168
GalU (C. glutamicum)      HAVGLAESVLDDEDDVAVMLPDDLVLPTGVM--ERMAQVRAEFGGSVLCAVEVSEADV 176
GalU (H. pylori)          HAILTGEALIGNEP--FAVILADLLCISHDHPVSLKQMTSLYQKYQCSIVAIEEVALEEV 167
                          .*: . . . . : .*: * * : : . . . . :

GtaB (B. subtilis)      HRYGIIDPLTSEGR--RYQVKNFVEKPPKGTAPSNLA ILGRYVFTPEIFMYLEEQQVVGAG 225
YngB (B. subtilis)      SKYGIINTSGSQGH--VYEVNDLVEKPSPEEAPSEIAVMGRYVLNSSFVSLKTIGRGAG 226
YtdA (B. subtilis)      HHYGVIKGEPVEKG--LYRIQDIVEKPKQ-NPSSHFAAAGRYIFTDPIDFNELEALEADSG 221
A4JT02 (B. vietnamiensis) KSYGVIDGKRWEDD--LFLKSGIVEKPEPAQAPSNGFVVGRYVLKPKPKHLRGLKPGAG 226
GalU (C. glutamicum)      SKYGFIEIEADTKDSDVKKVKGMVEKPAIEDAPSRLAATGRYLLDRKIFDALRRIIPGAG 236
GalU (H. pylori)          SKYGVIRGEWLEEG--VYEIKDMVEKPNQEDAPSNLAVIGRYILTPDIFELSETKPGKN 225
                          **::: . . : : : : : * * * * . * * * . * * * . .

GtaB (B. subtilis)      GEIQLTDAIQKLEI-QRVFAYDFEGKRYDVGKELGFITTTLEFAMQDKELRDLQVVFME 284
YngB (B. subtilis)      NEIQLTDALREVCRK-EPHARLLEGNRYDIGDKLGCFFKASTEIGLMRPEMRSQLLAYLE 285
YtdA (B. subtilis)      GEVQVTDAIKASLGA-CTVYKGLLEGERYDIGLQKDYDLKLIYDMLKTEKNPQ----- 272
A4JT02 (B. vietnamiensis) GELQLTDAIQSLTLD-EQVLAARYDGRFDCGSKLGYLKATVEFALRHPVEAADFERYL 285
GalU (C. glutamicum)      GELQLTDAIDLIDEGHPVHIVHQGKRHDLGNPPGGYIPACVDFGLSHPVYGAQLKDAIK 296
GalU (H. pylori)          NEIQITDALRTQAKR-KRIIAYQFKGKRYDCGSVEGYIEASNAYYKRLLE----- 275
                          .*: : : : : : : : . * * * * . :

GtaB (B. subtilis)      GLLNKEEI----- 292
YngB (B. subtilis)      DVIKRETKEMLR----- 297
YtdA (B. subtilis)      -----
A4JT02 (B. vietnamiensis) ARMSEQLVV----- 294
GalU (C. glutamicum)      QILAEHEAAERIADDSQVKLE 317
GalU (H. pylori)          -----

```

**Figure S1. Amino acid sequence alignment of *B. subtilis* UGPases and UGPases with available UDP-glucose bound structures.** The amino acid sequences of the *Bacillus subtilis* 168 confirmed and predicted UGPases GtaB, YngB and YtdA were aligned with the protein sequence of A4JT02 from *Bulkholderia vietnamiensis*, GalU from *Corynebacterium glutamicum* and GalU from *Helicobacter pylori*, for which UDP-glucose bound structures are available using CLUSTALW (5). Based on the alignment and the structural information, possible UDP-glucose binding residues were identified and highlighted in yellow and a conserved aspartic acid likely involved in metal ion binding is highlighted in cyan.

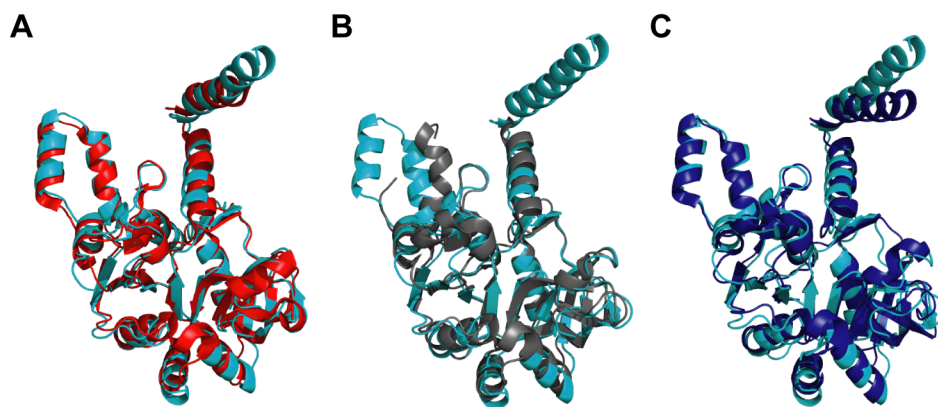

**Figure S2. Superimposition of the *B. subtilis* YngB structure with structures of other UGPases.** *A*, Superimposition of the *B. subtilis* YngB structure (cyan in all panels) with A4JT02 (PDB code: 5i1f) from *Bulkholderia vietnamiensis* (red) yielding an rmsd value of 1.39 Å over 274 aligned residues; *B*, superimposition with GalU<sub>Hp</sub> (PDB code: 3juk) from *Helicobacter pylori* (grey) giving an rmsd value of 1.61 Å over 250 aligned residues; and *C*, superimposition with GalU<sub>Cg</sub> (PDB code 2pa4) from *Corynebacterium glutamicum* (blue) yielding an rmsd value of 2.11 Å over 282 aligned residues.

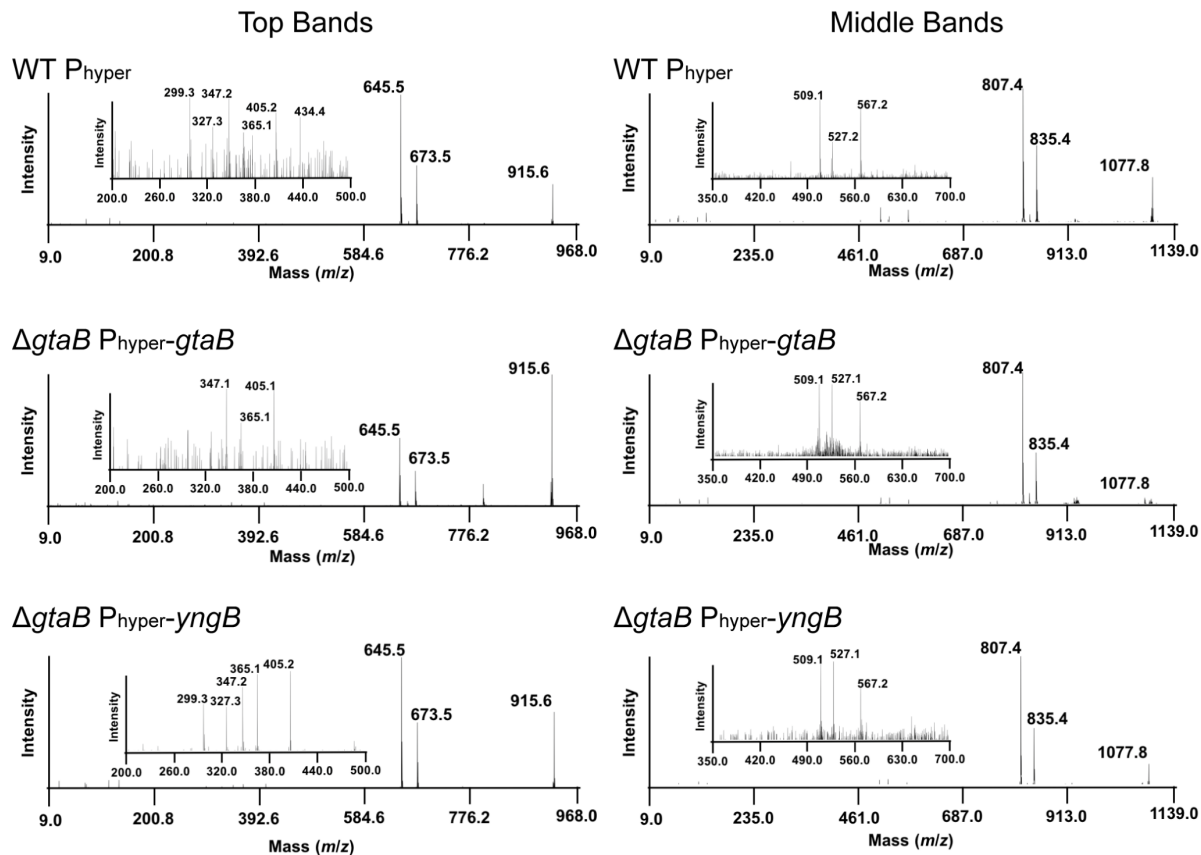

**Figure S3. MALDI TOF MS/MS analysis of extracted glucolipids.** Tandem mass spectrometry was performed on glycolipids isolated from one of the experiments from the wild-type *B. subtilis* (WT P<sub>hyper</sub>) strain and the *gtaB* complementation strains  $\Delta gtaB$  P<sub>hyper-gtaB</sub> and  $\Delta gtaB$  P<sub>hyper-yngB</sub>. The analysis was performed on the glycolipids with an observed mass of 915.6 (*m/z*) (top band) and proposed to correspond to (32:0) [DAG-Glc<sub>2</sub> + Na<sup>+</sup>] and an observed mass of 1077.9 (*m/z*) (middle band) and proposed to correspond to (32:0) [DAG-Glc<sub>3</sub> + Na<sup>+</sup>]. The MS/MS spectra are shown in the figure and chemical formula for the fragmented species are listed in Table S1. The insert is an enlarged view of the species in the 200-550 *m/z* range for the glycolipids isolated from the top band or 350-700 *m/z* range for the glycolipids isolated from the middle bands.

## References

1. Studier, F. W., Rosenberg, A. H., Dunn, J. J., and Dubendorff, J. W. (1990) Use of T7 RNA polymerase to direct expression of cloned genes. *Methods Enzymol* **185**, 60-89
2. Wagner, J. K., Marquis, K. A., and Rudner, D. Z. (2009) SirA enforces diploidy by inhibiting the replication initiator DnaA during spore formation in *Bacillus subtilis*. *Mol Microbiol* **73**, 963-974
3. Burkholder, P. R., and Giles, N. H., Jr. (1947) Induced biochemical mutations in *Bacillus subtilis*. *Am J Bot* **34**, 345-348
4. Koo, B. M., Kritikos, G., Farelli, J. D., Todor, H., Tong, K., Kimsey, H., Wapinski, I., Galardini, M., Cabal, A., Peters, J. M., Hachmann, A. B., Rudner, D. Z., Allen, K. N., Typas, A., and Gross, C. A. (2017) Construction and Analysis of Two Genome-Scale Deletion Libraries for *Bacillus subtilis*. *Cell Syst* **4**, 291-305 e297
5. Madeira, F., Park, Y. M., Lee, J., Buso, N., Gur, T., Madhusoodanan, N., Basutkar, P., Tivey, A. R. N., Potter, S. C., Finn, R. D., and Lopez, R. (2019) The EMBL-EBI search and sequence analysis tools APIs in 2019. *Nucleic Acids Res* **47**, W636-W641
